# Supplementary material for: Aphid BCR4 Structure and Activity Uncover a New Defensin Peptide Superfamily
Source: MDPI journal article supplement (doi:10.3390/ijms232012480), 2022-10-18
Supplement: s1 [file s1]

# SUPPLEMENTARY INFORMATION

## Aphid BCR4 Structure and Activity Uncover a New Defensin Peptide Superfamily

Karine Loth <sup>1,2,†</sup>, Nicolas Parisot <sup>3,†</sup>, Françoise Paquet <sup>1</sup>, Hugo Terrasson <sup>3</sup>, Catherine Sivignon <sup>4</sup>, Isabelle Rahioui <sup>4</sup>,  
Mélanie Ribeiro Lopes <sup>3</sup>, Karen Gaget <sup>4</sup>, Gabrielle Duport <sup>4</sup>, Agnès F. Delmas <sup>1</sup>, Vincent Aucagne <sup>1</sup>,  
Abdelaziz Heddi <sup>3</sup>, Federica Calevro <sup>4</sup> and Pedro da Silva <sup>3,\*</sup>

<sup>1</sup> Centre de Biophysique Moléculaire, CNRS UPR 4301, 45071 Orléans, France

<sup>2</sup> UFR Sciences et Techniques, Université d'Orléans, 45071 Orléans, France

<sup>3</sup> Univ Lyon, INSA Lyon, INRAE, BF2I, UMR 203, 69621 Villeurbanne, France

<sup>4</sup> Univ Lyon, INRAE, INSA Lyon, BF2I, UMR 203, 69621 Villeurbanne, France

\* Correspondence: pedro.da-silva@insa-lyon.fr

† These authors contributed equally to this work.

### **This PDF file includes:**

Supplementary methods for BCR4 chemical synthesis (including table S1 and Figures S1 to S10)

Table S2

## BCR4 chemical Synthesis

### 1. General information

All reagents and solvents were used without further purification. Protected amino acids, Fmoc-Rink amide linker, Fmoc-Tyr(*t*Bu)-Thr( $\Psi^{(Me,Me)Pro}$ )-OH and HCTU were purchased from Merck Biosciences (Nottingham, UK). Tentagel R NH<sub>2</sub> and Wang-type Fmoc-Asp(*Ot*Bu) TentaGel R PHB resins were purchased from Rapp polymers (Tuebingen, Germany). Peptide synthesis grade DMF was purchased from VWR (Fontenay-sous-Bois, France). Ultrapure water was obtained using a Milli-Q water system from Millipore (Molsheim, France). All other chemicals were from Sigma Aldrich (St-Quentin-Fallavier, France) and solvents from SDS-Carlo Erba (Val de Reuil, France).

High resolution ESI-MS analyses were performed on a maXis ultra-high-resolution Q-TOF mass spectrometer (Bruker Daltonics, Bremen, Germany), using the positive mode. The multiply-charged envelope was deconvoluted using the Charge Deconvolution algorithm in Bruker Data Analysis 4.1 software to obtain the monoisotopic [M+H]<sup>+</sup> molecular ion value. HPLC analyses were carried out on a LaChrom Elite system consisting of an L-2130 pump, an L-2455 diode array detector and an L-2200 autosampler, and equipped with a Jupiter C4 column (300 Å, 5 µm, 250 × 4.6 mm, 1 mL/min flow rate). Semi-preparative HPLC purifications were carried out on a Chromaster 600 system consisting of a 5160 pump, a 5430 diode array detector and a 5260 autosampler, equipped with either a Jupiter C4 (300 Å, 5 µm, 250 × 10 mm, 3 mL/min flow rate) or a Nucleosil C18 (300 Å, 5 µm, 250 × 10 mm, 3 mL/min flow rate) column. Solvents A and B are 0.1% TFA in H<sub>2</sub>O and 0.1% TFA in MeCN, respectively. Chromatography was conducted at room temperature unless otherwise mentioned. LC/HRMS analyses were carried out on an Ultimate 3000 RSLC HPLC system (Dionex, Germering, Germany), coupled with the maXis mass spectrometer and fitted with a Aeris WidePore XB-

C18 (200 Å, 3.6 µm, 2.1 × 150 mm, 0.5 mL/min flow rate, 40°C) column. Solvents A and B were 0.1% formic acid in H<sub>2</sub>O and 0.08% formic acid in MeCN, respectively. Gradient: 3% B for 0.6 min, then 3 to 50% B over 10.8 min.

Unless specified otherwise, quantities of purified peptides were determined by weight, based on a molecular mass taking into account trifluoroacetate counter-ions (one per Arg, His, Lys and N-terminal amine of the peptide sequence) but not water content.

Deoxygenation of solutions used for native chemical ligation and oxidative folding was performed through four consecutive vacuum (~5 mbar)/argon cycles.

## **2. General procedures for solid phase peptide synthesis**

Fmoc-based solid phase peptide syntheses (SPPS) were carried out on a Prelude synthesizer from Protein Technologies (Tucson, Arizona USA). Standard side-chain protecting groups were used: Arg(Pbf), Asn(Trt), Asp(O*t*Bu), Cys(Trt), Glu(O*t*Bu), Gln(Trt), His(Trt), Lys(Boc), Ser(*t*Bu), Thr(*t*Bu), Trp(Boc) and Tyr(*t*Bu), as well as Cys(*S**t*Bu) for the thioesterification device.

Syntheses were performed at a 25 µmol scale. Protected amino acids (0.25 mmol, 10 equiv.) were coupled using HCTU (98 mg, 0.238 mmol, 9.5 equiv.) and *i*Pr<sub>2</sub>NEt (87 µL, 0.5 mmol, 20 equiv.) in NMP (3 mL) for 30 min. Capping of potential unreacted amine groups was achieved by treatment with acetic anhydride (143 µL, 1.51 mmol, 60 equiv.), *i*Pr<sub>2</sub>NEt (68 µL, 0.39 mmol, 15.5 equiv.) and HOBt (6 mg, 0.044 mmol, 1.8 equiv.) in NMP (3 mL) for 7 min. Fmoc group was removed by three successive treatments with 20% piperidine in NMP (3 mL) for 3 min. Deprotection and cleavage from the resin was performed through a treatment with TFA/H<sub>2</sub>O/*i*Pr<sub>3</sub>SiH/phenol (88:5:2:5) for 2 h, then precipitated by dilution into an ice-cold 1:1 diethyl ether/petroleum ether mixture, recovered by centrifugation, further washed three times with diethyl ether and dried under reduced pressure.

### 3. Single fragment solid phase synthesis of the reduced form of BCR4

Sequence:

H-<sup>1</sup>DFDPTEFKGPFPTIEICKSKYCAVVCNYTSRPCYCVEAAKERDQWFPYCY<sup>50</sup>D-OH

Synthesis of the reduced form of BCR4 was first attempted through a single fragment Fmoc SPPS, starting from Fmoc-Asp(OtBu) TentaGel R PHB resin (132 mg, 0.19 mmol/g, 25  $\mu$ mol). Tyr27 and Thr28 were introduced as a pseudoproline dipeptide (Fmoc-Tyr(tBu)-Thr( $\square^{(Me,Me)Pro}$ )-OH), and a double coupling procedure (2 x 30min) was used for residues Asn26 to Asp1.

Even using this optimized protocol, the target peptide was a minor component of the crude mixture, and we could not separate it from truncated acetylated peptides contaminants using standard semi-preparative HPLC.

**ESI-HRMS** ( $m/z$ ):  $[M+H]^+$  calcd. for C<sub>266</sub>H<sub>379</sub>N<sub>62</sub>O<sub>79</sub>S<sub>6</sub>: 5897.5869, found: 5897.5911.

**HPLC analysis:**  $t_R$  = 29.6 min (gradient: 5-50% B/A over 30 min).

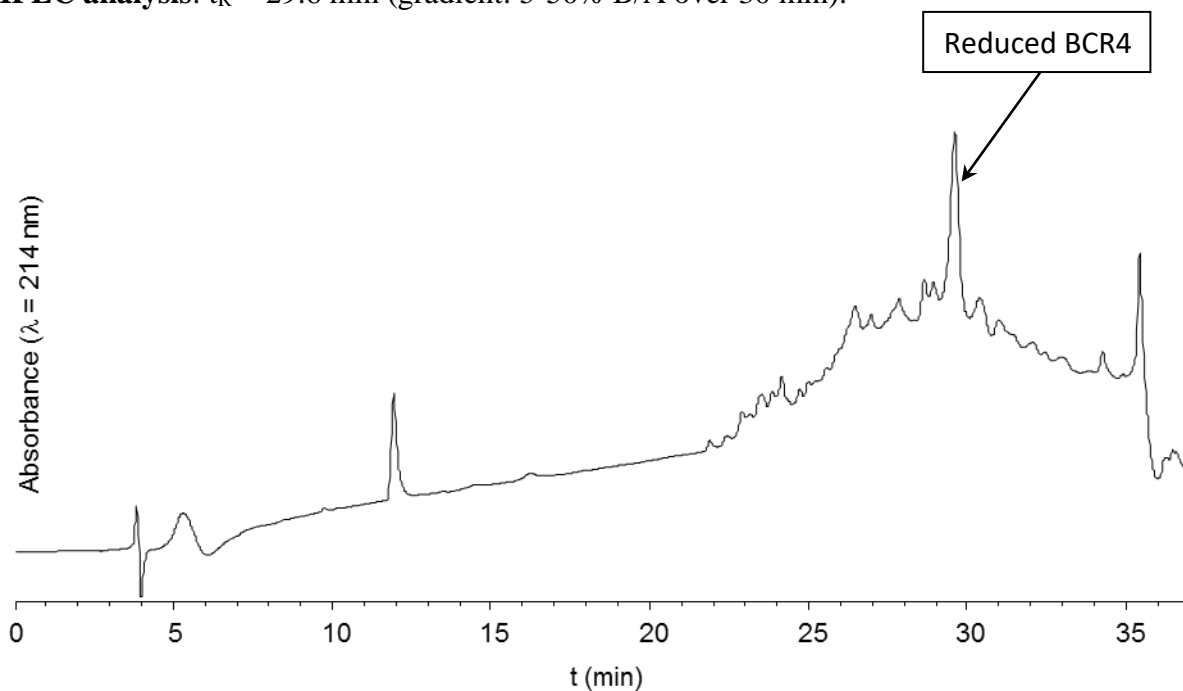

**Figure S1:** HPLC trace of crude reduced BCR4 obtained from a single fragment synthesis. Gradient: 5-50% B/A over 30 min.

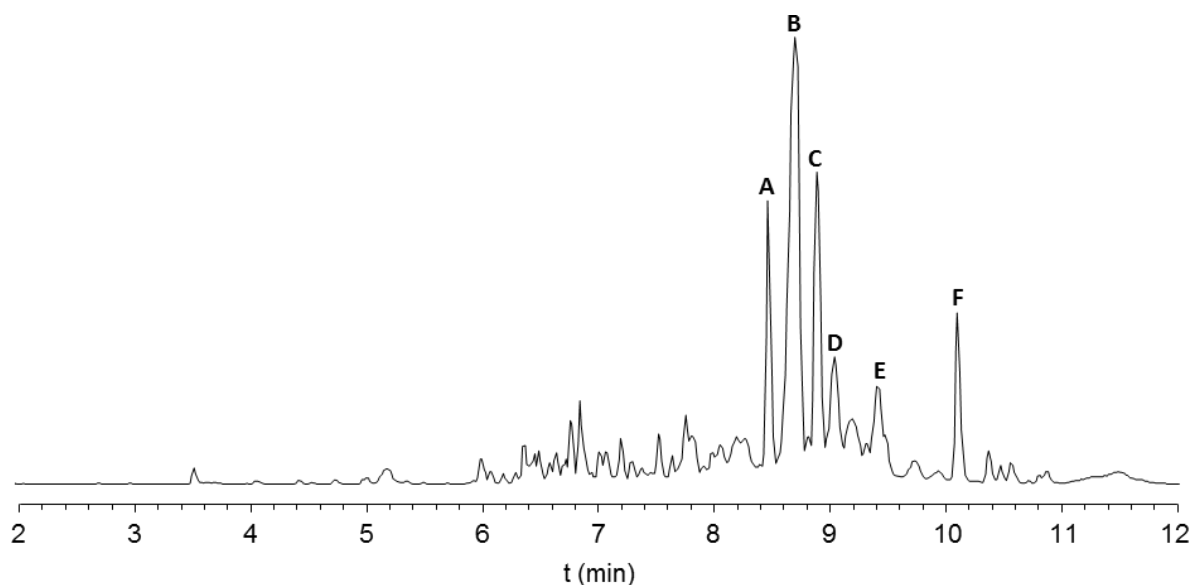

**Figure S2:** LC/MS analysis of crude reduced BCR4 obtained from a single fragment synthesis (base peak ion chromatogram).

**Table S1:** Attribution of the main peaks observed during LC/MS analysis of crude reduced BCR4 obtained from a single fragment synthesis.

| Peak ( $t_R$ (min) ) | [M+H] <sup>+</sup> calcd. | [M+H] <sup>+</sup> found | Attributed to                 |
|----------------------|---------------------------|--------------------------|-------------------------------|
| A (8.48)             | 4561.9734                 | 4561.9759                | Ac-[13-50]                    |
| B (8.71)             | 4659.0262                 | 4659.0286                | Ac-[12-50]                    |
| C (8.90)             | 5897.5869                 | 5897.5911                | [1-50]: reduced form of BCR4  |
| D (9.06)             | 4715.0888                 | 4713.0826                | Ac-[13-50] <i>t</i> Bu adduct |
| E (9.17)             | 5953.6495                 | 5953.6548                | [1-50] <i>t</i> Bu adduct     |
| F (10.11)            | 4742.0309                 | 4742.0321                | Fmoc-[13-50]                  |

#### 4. Native chemical ligation-based synthesis of the reduced form of BCR4

Considering the difficulties observed during the single fragment SPPS, synthesis of the reduced form of BCR4 was achieved through a two-fragment native chemical ligation (NCL) strategy, based on the reaction of a [1-20] *N*-2-hydroxy-5-nitrobenzylcysteine (*N*-Hnb-Cys) cryptothioester<sup>1</sup> with a [21-50] cysteinyl peptide (supplementary figure S3).

<sup>1</sup> (a) V. P. Terrier, H. Adihou, M. Arnould, A. F. Delmas, V. Aucagne, *Chem. Sci.*, **2016**, 7, 339–345 (b) D. Lelièvre, V. P. Terrier, A. F. Delmas, V. Aucagne, *Org. Lett.*, **2016**, 18, 920–923 (c) V. P. Terrier, A. F. Delmas, V. Aucagne, *Org. Biomol. Chem.*, **2017**, 15, 316–319 (d) G. Martinez, J.-P. Hograindleur, S. Voisin, R. Abi Nahed, T. M. Abd El Aziz, J. Escoffier, J. Bessonnat, C.-M. Fovet, M. De Waard, S. Hennebicq, V. Aucagne, P. F. Ray, E. Schmitt, P. Bulet, C. Arnould, *Mol. Hum. Rep.*, **2017**, 23, 116–131.

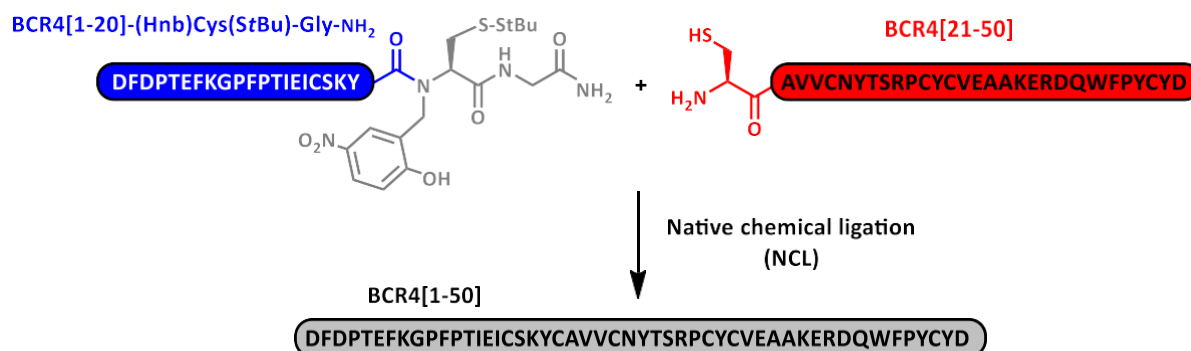

**Figure S3:** NCL-based synthesis of the reduced form of BCR4.

#### 4.1- Synthesis of BCR4[1-20] crypto thioester

Sequence: H-<sup>1</sup>DFDPTFEKGPFPPTIEICKS<sup>20</sup>Y-(Hnb)C(StBu)G-NH<sub>2</sub>

Rink linker, Fmoc-Gly-OH and Fmoc-Cys(StBu)-OH were successively coupled by automated SPPS on a Tentagel R NH<sub>2</sub> resin (120 mg, 0.21 mmol/g, 25 μmol). Resulting peptidyl resin was washed with a 1:1 DMF/MeOH mixture, then swollen in 9:9:2 DMF/MeOH/AcOH for 5 min. The reactor was drained off and the resin was washed with 1:1 DMF/MeOH. 2-Hydroxy-5-nitrobenzaldehyde (HNBA) in 1:1 DMF/MeOH (125 mM, 10 equiv., 2 mL) was then added and the reactor was left for 1 h under stirring through nitrogen bubbling. The reactor was drained and the resin was washed with 1:1 DMF/MeOH. Without delay, a fresh solution of sodium cyanoborohydride in 9:9:2 DMF/MeOH/AcOH (250 mM, 20 equiv. 2 mL) were added and the reactor was left for 1 h under stirring by nitrogen bubbling. The reactor was drained off and the resin was extensively washed with 1:1 DMF/MeOH, NMP, 20% piperidine in NMP, NMP, dichloromethane then NMP. Tyr<sup>20</sup> was introduced through a 3 x 2 h coupling protocol, then the elongation from residues 19 to 1 was pursued using standard conditions, using a double coupling procedure for residues Pro<sup>12</sup> and Phe<sup>11</sup>.

Crude peptide was purified by semi-preparative RP-HPLC to yield pure crypto thioester (15 mg, 4.9 μmol, 20%).

We found that the Asp3-Pro4 peptide bond was particularly sensitive to acid hydrolysis:<sup>2</sup> The crude or purified peptide should not be kept in HPLC solvents (0.1% TFA) for a prolonged time (>10 h) nor be heated above room temperature under these conditions, and the purified fractions should be lyophilized immediately after purification. Peptide re-dissolved in pure water was however stable for a few months at -20°C.

**ESI-HRMS** ( $m/z$ ):  $[M+H]^+$  calcd. for  $C_{125}H_{179}N_{26}O_{37}S_3$ : 2732.2087, found: 2732.2119.

**HPLC analysis:**  $t_R$  = 19.6 min (gradient: 20-55% B/A over 21 min).

**HPLC purification:**  $t_R$  = 17.4 min (Jupiter C4, gradient: 30-55% B/A over 19 min).

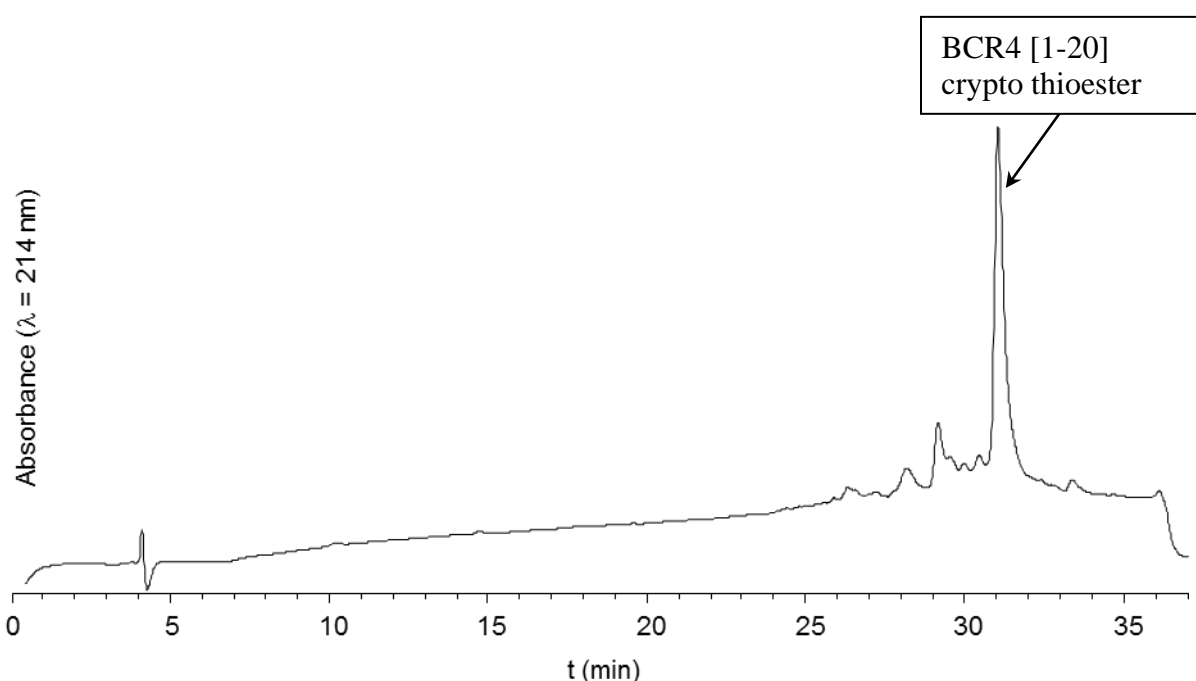

**Figure S4:** HPLC trace of crude BCR4[1-20] crypto thioester. Gradient: 5-50% B/A over 30 min.

<sup>2</sup> (a) D. Piszkiwicz, M. Landon, E. L. Smith, *Biochem. Biophys. Res. Commun.*, **1970**, *40*, 1173–1178 (b) I. Ségalas, R. Thai, R. Ménez, C. Vita, *FEBS Lett.*, **1995**, *371*, 171–175.

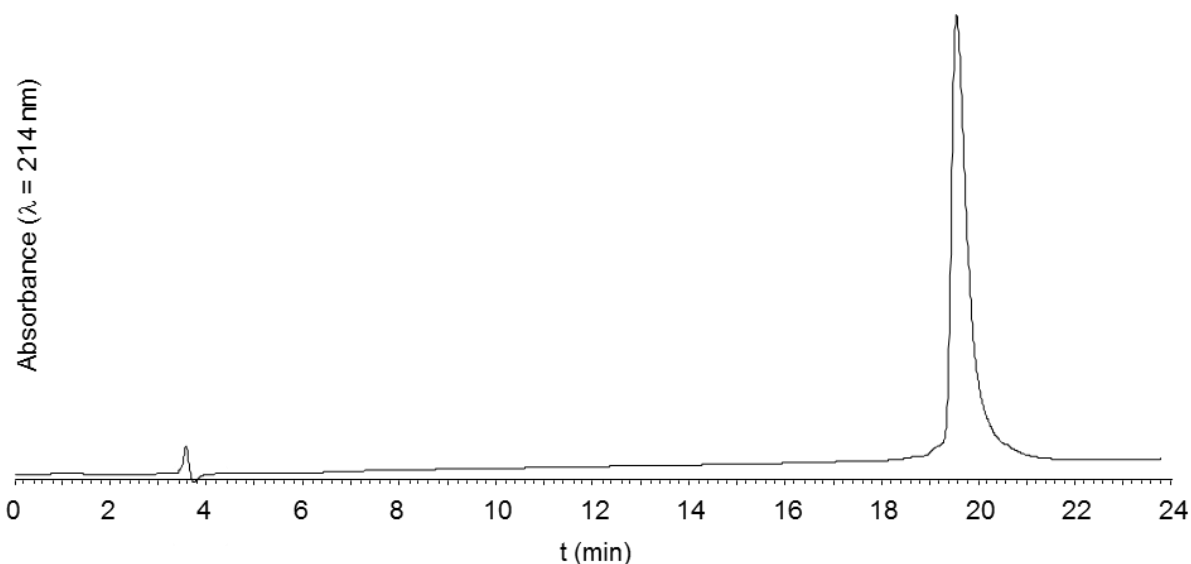

**Figure S5:** HPLC trace of purified BCR4[1-20] crypto thioester. Gradient: 20-55% B/A over 21 min.

#### 4.2- Synthesis of BCR4[21-50] cysteinyl peptide

Sequence: H-<sup>21</sup>CAVVCNYTSRPCYCV EAAKERDQWFPYCY<sup>50</sup>D-OH

BCR4 [21-50] cysteinyl peptide was synthesized through standard Fmoc SPPS starting from Fmoc-Asp(OtBu) TentaGel R PHB resin (132 mg, 0.19 mmol/g, 25 μmol), using a double coupling procedure for residues Ala39 to Val23.

Crude peptide was purified by semi-preparative RP-HPLC to yield pure cysteinyl peptide (16 mg, 4.0 μmol, 16%).

**ESI-HRMS** ( $m/z$ ):  $[M+H]^+$  calcd. for C<sub>157</sub>H<sub>225</sub>N<sub>40</sub>O<sub>47</sub>S<sub>5</sub>: 3582.5049, found: 3582.5067.

**HPLC analysis:**  $t_R$  = 13.9 min (gradient: 20-55% B/A over 21 min).

**HPLC purification:**  $t_R$  = 14.2 min (Nucleosil C18, gradient: 25-30% B/A over 15 min, 50°C).



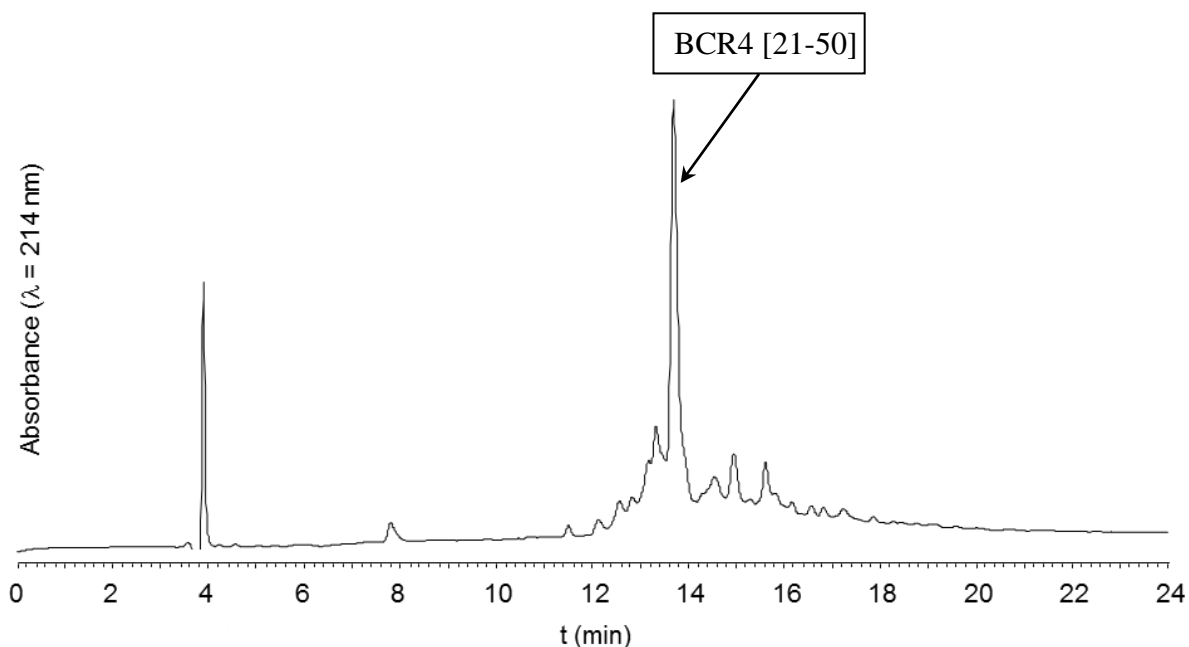

**Figure S6:** HPLC trace of crude BCR4[21-50]. Gradient: 20-55% B/A over 21 min.

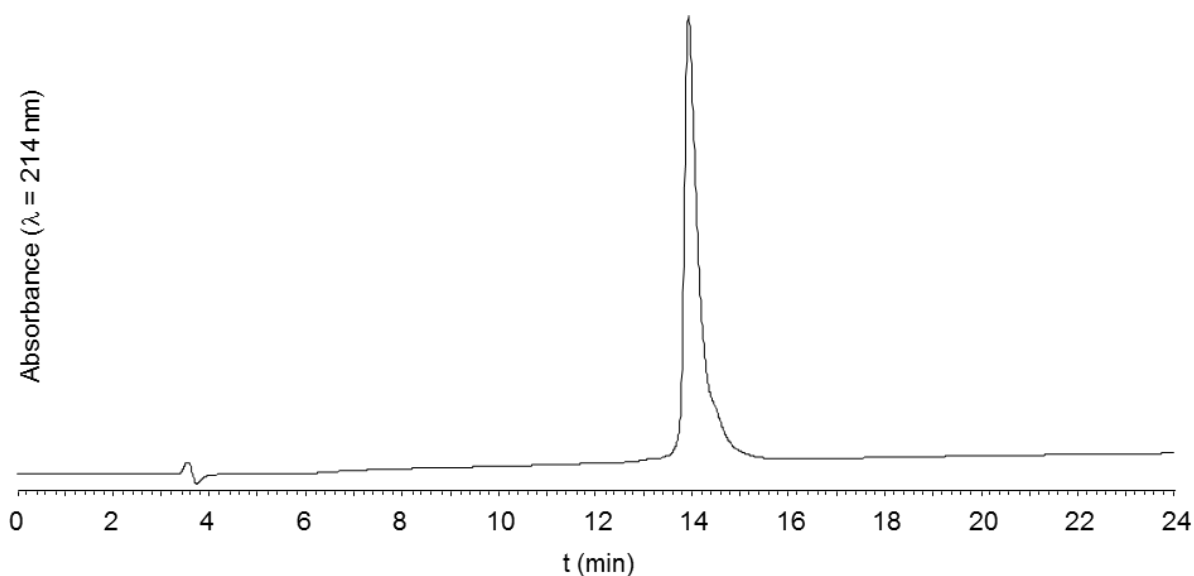

**Figure S7:** HPLC trace of purified BCR4[21-50]. Gradient: 20-55% B/A over 21 min.

#### 4.3- Native chemical ligation

Under an argon atmosphere, 765  $\mu$ l of a deoxygenated 0.2 M sodium phosphate buffer pH = 6.5 containing 200 mM 4-mercaptophenylacetic acid (MPAA), 50 mM *tris*-carboxyethylphosphine (TCEP) and 6 M guanidine hydrochloride (Gu.HCl) was added to HPLC-purified [1-20] cysteinyl peptide (1.56  $\mu$ mol, final concentration 2 mM), and 4.6 mg [1-20] crypto thioester (1.2 equiv.). The resulted solution was incubated at 37°C for 24 h, then quenched by addition

of 15 mL of a H<sub>2</sub>O/MeCN/AcOH 70:25:5 mixture. The solution was washed three times with 30 ml Et<sub>2</sub>O then centrifuged. The precipitate was dissolved in 1 mL 6M Gu.HCl, combined with the supernatant then purified by semi-preparative RP-HPLC to yield 3.3 mg (528 nmol, 34%) of pure BCR4.

The crude or purified peptide should not be kept in HPLC solvents (0.1% TFA) for a prolonged time (>10 h) nor be heated above room temperature under these conditions, and the purified fractions should be lyophilized immediately after purification. Peptide re-dissolved in pure water was however stable for a few weeks at -20°C.

**ESI-HRMS** ( $m/z$ ): [M+H]<sup>+</sup> calcd. for C<sub>266</sub>H<sub>379</sub>N<sub>62</sub>O<sub>79</sub>S<sub>6</sub>: 5897.5869, found: 5897.5883.

**HPLC analysis:**  $t_R$  = 18.8 min (gradient: 20-55% B/A over 21 min).

**HPLC purification:**  $t_R$  = 16.5 min (Jupiter C4, gradient: 30-53% B/A over 17 min).

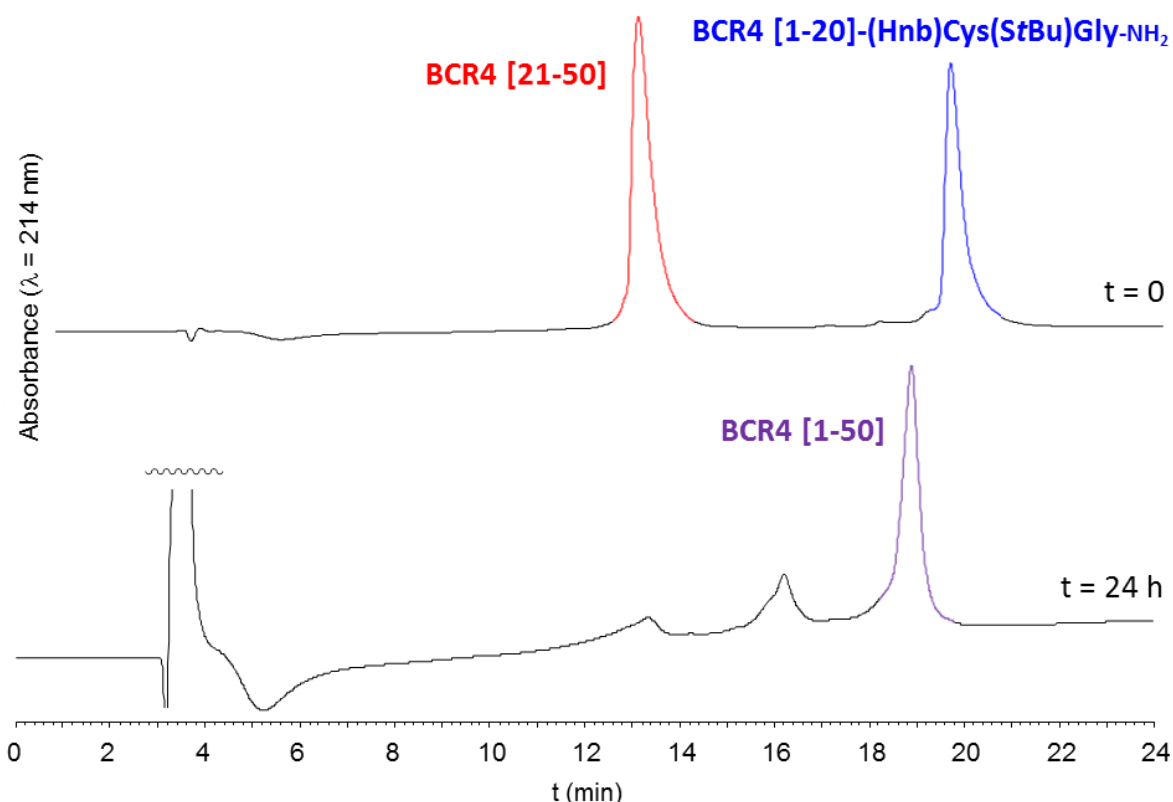

**Figure S8:** HPLC monitoring of the NCL reaction. Gradient: 20-55% B/A over 21 min.

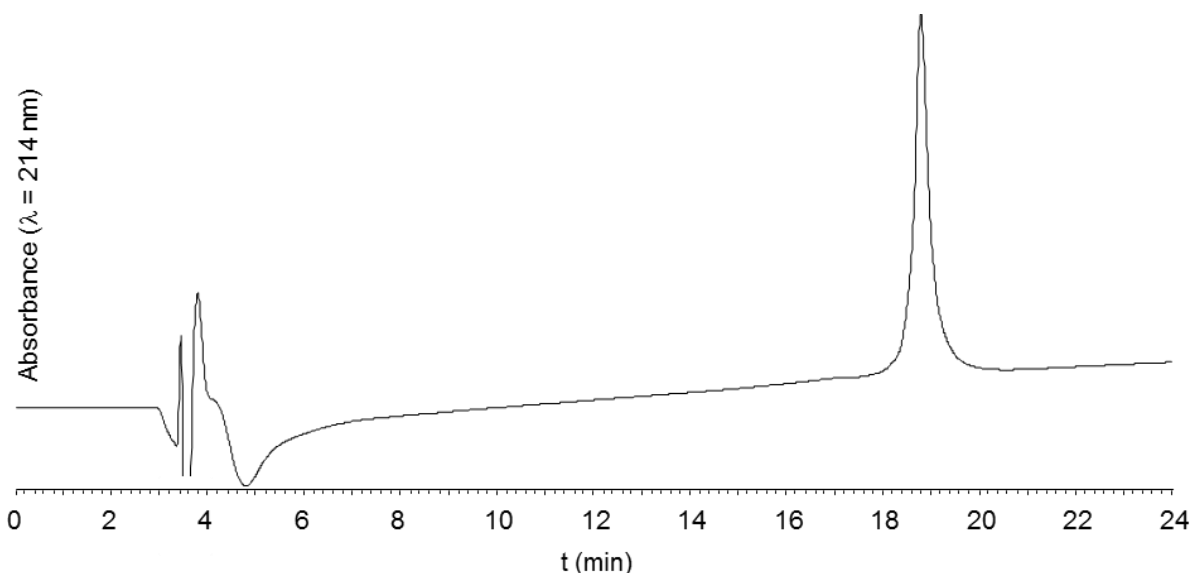

**Figure S9:** HPLC trace of purified reduced BCR4. Gradient: 20-55% B/A over 21 min.

## 5. Oxidative folding

Oxidative folding was performed by incubating the reduced peptide (622 nmol) in 20.7 mL (30  $\mu$ M final concentration) of a deoxygenated buffer containing 0.1 mM oxidized glutathione (10 equiv.), 1 mM glutathione (100 equiv.), 1 mM EDTA, 100 mM TRIS, pH 8.5, at 20 °C, for 48 h under an argon atmosphere. The reaction was acidified by adding TFA (200  $\mu$ L), and the crude mixture was purified by semi-preparative HPLC to give pure BCR4 (135 nmol, 22%).

The crude or purified peptide should not be kept in HPLC solvents (0.1% TFA) for a prolonged time (>10 h) nor be heated above room temperature under these conditions, and the purified fractions should be lyophilized immediately after purification. Peptide re-dissolved in pure water was however stable for several months at -20°C.

**ESI-HRMS** ( $m/z$ ):  $[M+H]^+$  calcd. for  $C_{266}H_{373}N_{62}O_{79}S_6$ : 5891.5400, found: 5891.5437.

**HPLC analysis:**  $t_R$  = 22.5 min (gradient: 5-50% B/A over 30 min).

**HPLC purification:**  $t_R$  = 25.7 min (Nucleosil C18, gradient: 5-45% B/A over 30 min).

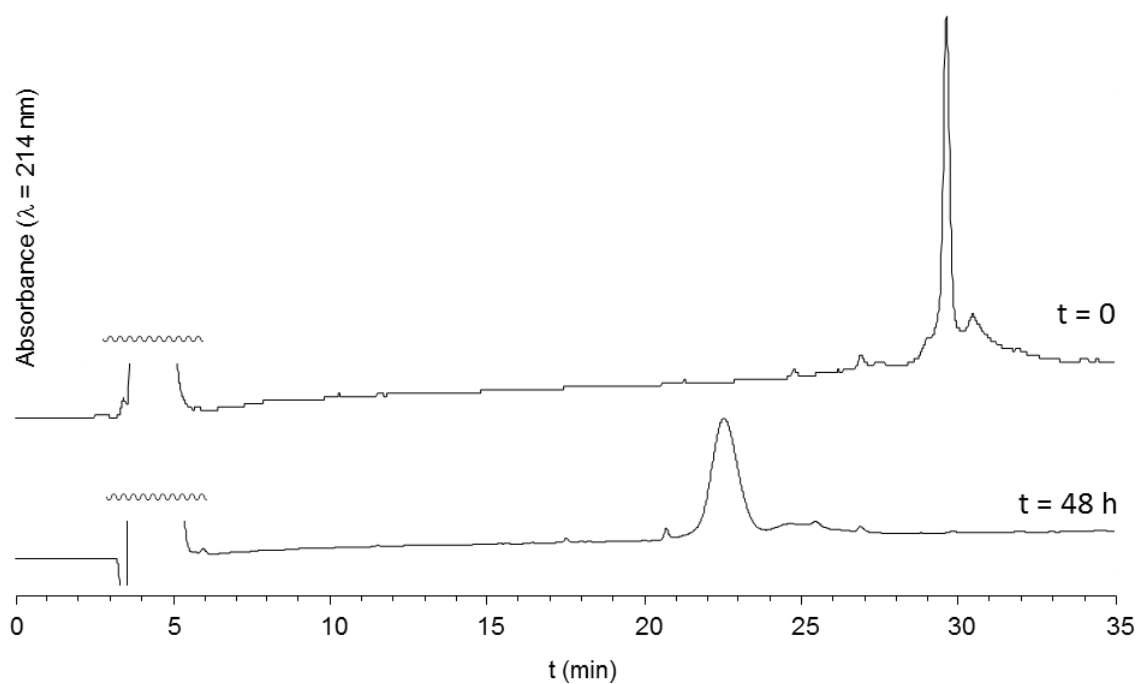

**Figure S10:** HPLC monitoring of the oxidative folding. Gradient: 5-50% B/A over 30 min.

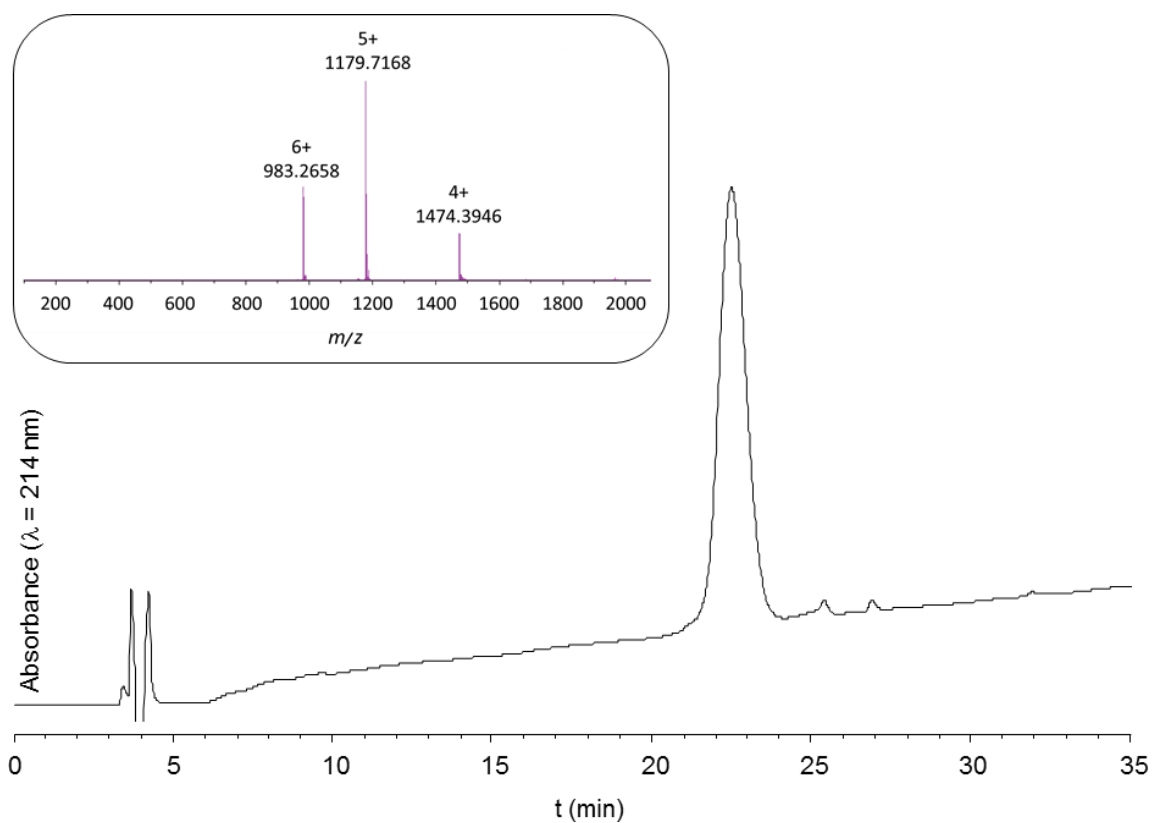

**Figure S11:** HPLC trace and ESI-HRMS spectrum of purified BCR4. Gradient: 5-50% B/A over 30 min.

**Table S2.** Protein sequences of the putative BCR homologs in 22 aphid species which sequences are deposited in publicly available databases.

| BCR subfamilies | Protein sequences in aphid species*                                                                                                                                                                                                                                                                                                                                                                                                                                                                                                                                                                                                                                                                                                                                                                                                                                                                                                                                                                                                                                                                                                                                                                                                                                                                                                                                                                                                                                                                                                                                                                                                                                                                                                                                                                                                                                 |
|-----------------|---------------------------------------------------------------------------------------------------------------------------------------------------------------------------------------------------------------------------------------------------------------------------------------------------------------------------------------------------------------------------------------------------------------------------------------------------------------------------------------------------------------------------------------------------------------------------------------------------------------------------------------------------------------------------------------------------------------------------------------------------------------------------------------------------------------------------------------------------------------------------------------------------------------------------------------------------------------------------------------------------------------------------------------------------------------------------------------------------------------------------------------------------------------------------------------------------------------------------------------------------------------------------------------------------------------------------------------------------------------------------------------------------------------------------------------------------------------------------------------------------------------------------------------------------------------------------------------------------------------------------------------------------------------------------------------------------------------------------------------------------------------------------------------------------------------------------------------------------------------------|
| BCR1-2-4-5      | <p>&gt;Apis-BCR1<br/>MKLLHGFLIIMLTIMHLSIQYAYGGPFLT KYLC DRVCHKLCGDEFVCSCIQYKSLKGLWFP<br/>HCPTGKASVVLHNFLTSP</p> <p>&gt;Apis-BCR2 (ACYPI38738)<br/>MKLLYGFLIIMLTIHLSVQYFESPFETKYNC DTHCNKLCGKIDHCSCIQYHSMEGLWFPH<br/>CRTGSAAQMLHDFLSNP</p> <p>&gt;Apis-BCR4<br/>MRLLYGFLIIMLTIYLSVQDFDPTFEKGPFTIEICSKYCAVVCNYTSRPCYCVAAKER<br/>DQWFPYCYD</p> <p>&gt;Apis-BCR5 (ACYPI084619)<br/>MRLLYGFLIIMLTIHLSVQDIDPNTLRGPYPTKEICSKYCEYNVVC GASLPCICVQDARQ<br/>LDHWFAYCYDGGPEMLM</p> <p>&gt;Apis-BCRnew1 NC_042494.1:96422603..96422806<br/>MRLLYGFLIIMLTIQLSVQSYYPGRPFVSRHNCEAACTRICGFSNPCSCVQYGSIMWSP<br/>HCRSGRAAGSWPGEDPY</p> <p>&gt;Akon-FQ998496.1 BCR1 BCR2 BCR4 BCR5<br/>MRLLYVFLVVMLTMQLSIQYTSGPSFQTRYNCNNICHKLCGSAACACSQYRSLKGMWFPH<br/>CANGQAAQVLHNFLSN</p> <p>&gt;Akon-FD015834.1 BCR1 BCR2 BCR4 BCR5<br/>MKYFYGFLIIMLTIHLSVQYHYIESPFETRFGCDNV CYKLCGKRVPSCVQYDAMNGLWF<br/>PHCQEGHAAEELHQFL</p> <p>&gt;Dnox-NW_015368581.1 BCR1 BCR2 BCR4 BCR5<br/>IRLLFGLLIIMLTIHLSIQEDDYPTRKQCNETCIANCRSDPNYEGRWMWCLREAGSEMIG<br/>LWYCQC</p> <p>&gt;Mros-WHPZ01509477.1 BCR1 BCR2 BCR4 BCR5<br/>MRFLYGFLIIMLTIHLSVQLSISPFEEKFTCDRICYKLCGNV NKCRCCQYDSLNLWFP<br/>CSVGNAAIVLHEFLSNP</p> <p>&gt;Mros-WHPZ01494279.1 BCR1 BCR2 BCR4 BCR5<br/>MRFLYGFLIIMLTIHLSIQLFISPFEEKFTCDRICYKLCGNV HKCRCCQYDSLNLWFP<br/>CSGGNAAIVLHEFLSNP</p> <p>&gt;Mros-WHPZ01338884.1 BCR1 BCR2 BCR4 BCR5<br/>MRFLYGFLIIMLTIHLSVQLSRSPLES RFECENICYSLCGGDNVCNCEQYKSLNNLWFP<br/>CRFGHAAMVLHEFLSSP</p> <p>&gt;Mros-WHPZ01584390.1 BCR1 BCR2 BCR4 BCR5<br/>MRLMFGFLIIMLTIINLSVQSYYPGRPFISKYNCEAACTRICGFSNPCSCLQYDVISLW<br/>FPRCRSGHPAGV</p> <p>&gt;Mros-WHPZ01569289.1 BCR1 BCR2 BCR4 BCR5<br/>MKLLFGFLIIMLTLHLSIQNPYHSDQSYRTKFECENDCSSMCITGYDGCERLRTVYYLW<br/>SCYCTPAG</p> <p>&gt;Smis-CM017799.1-23116456 BCR1 BCR2 BCR4 BCR5<br/>MKLLFGFSIIMLTIHLSVQSYYPGRPFASKYNCETVCTRICGFSNPCSCLQFDLMNAPL<br/>WFPRCRSGHA</p> |
| BCR3            | <p>&gt;Apis-BCR3 (ACYPI44142)<br/>MSVRKNVLPMTMFVLLIMSPVTPTSVFISAVCYSGCGLALVCFVSNGITNGLDYFKSSA<br/>PLSTSETSCGEAFDTCTDHCLANFKF</p> <p>&gt;Agly-AG010439-PA BCR3<br/>MWTFILVGLLMMTCVTEASRLNRFM SNVCYFGCLAKRVACFSSTGAIFGTVPYGIIAVTP<br/>ALESCTVVFRIKASCIAILILPKI</p> <p>&gt;Dnox-NW_015368357.1 BCR3<br/>MQSRSNVWPSLFLVALLMSPVTHANIFIAAVCYSGCGLALV CYVSNGIANGIHYAKTF<br/>TSLPPTEVGCGEAFVECKNNCLEHF</p> <p>&gt;Dnox-XP_015363544.1 PREDICTED:<br/>uncharacterized protein LOC107161588] BCR3</p>                                                                                                                                                                                                                                                                                                                                                                                                                                                                                                                                                                                                                                                                                                                                                                                                                                                                                                                                                                                                                                                                                                                                                                                                                                                                                                                                                                         |

MVAQKMWSLILIGLLFSSSANAGPIXAGICYAGCAAVTVACFGAAGFTFGTVPGAVIAAT  
PALAACNAAFGICEASCVAALVVPTP  
>Mper-MyZPE13164\_0\_v1.0\_000159160.2\_pep | 88 aa BCR3  
MSARNNMLPSLFIVLLIMSPVTPAHFFIAYVCYAGCGSLAIVCYVSNGLIANGIQFAKTAS  
ALPPTKISCGQAFNACKDDCLVNFTLTP  
>Mcer-Mca00644.t1-protein BCR3  
MSARTNVLPSTFVMLLIMSPVAPAHLFIAVVCYAGCGSLALTCYVSNGLANGLEFIKTAS  
FLPPTAITCAEAFVACKTDCLNFTLTP  
>Tcit-CD450908.1 BCR3  
MSARKNILATVFIVLLFSTSVTPTNIFISAVCFSGCGTMLLTICYVITGFEFIKAADVDDH  
LPTSGCRTMYHECTAVCKKSYK  
>Rpad-Rp1008 BCR3  
MSAQNKMLTSLFIVLLITTSVTPTSIFISSICYSGCGTMAVACYVMTGIQYIMGASGLTT  
NGMGCGASFVVCCKDSCIESTYN  
>Rmai-NC\_040880.1 BCR3  
MSAQNKMLTSLFIVLLITTSVTPTSIFISSICYSGCGTMAVACYVMTGIQYIMGASGLTR  
TGLGCGESFVVCCKDSCIQSY  
>Rmai-XP\_026822757.1 BCR3 uncharacterized protein  
LOC113560848  
MVGQKMLSLLMVGLLLSPPALAGPVAAGICYAGCAAVTVACFTAAGFTFGTVPASVIAAT  
FVLAACNTAFGVCEASCVAALVVPTP  
>Rmai-NC\_040879.1 BCR3  
MWTFFMAGLLMTCVTEAGPFNRLISNVCYLGCLAERVACFSSSGAIFGTVPYGIIAVTP  
ALNTCNAIFKICKVGCIAILISPR  
>Sgra-QEWZ01000258.1 BCR3  
MSAQNKMLTSLFIVLLMTTSVTPSSIFISSICYSGCGTMAVACYVMTGIQYIMGASGLTR  
IGLSCGESFFVVCCKDSCIQSY  
>Sgra-QEWZ01001431.1 BCR3  
MWTFFMAGLLMTCVTEAGPLNRLMSNVCYLGCLAERVACFSSSGAIIIGTVPYGIIAVTP  
ALNTCTAIFNICKVGCIAILISPR  
>Msac-NW\_020270519.1 BCR3  
MSARNNIFTSLFVLLMTTSVTPAKIGLSIICYSGCGSVAIGCYVINSFEFLKSFFVDPDT  
MTSDCGESFDECKYACI  
>Msac-XP\_025200550.1 BCR3 uncharacterized protein  
LOC112598338  
MVAQKMLSLVLVGLLLSSSAHAGPLTAGICYAGCAAVTVACFSAAGFTFGTVPGAVIAAT  
PALAACNAAFGICEASCVAALVVFPV  
>Msac-XP\_025194587.1 BCR3 uncharacterized protein  
LOC112594148  
MVAQKMLSLVLVGLLLSSSAHAGPLTAGICYAGCAAVTVACFSAAGFTFGTVPGAVIAAT  
PALAACNAAFGICEASCVAALVVFPV  
>Agos-DR392815.1 BCR3  
MSAKKNILATAFIVLLFSTSVTPTNIFISAVCFSGCGTMLVTCYVITGLEILKAADVDDH  
LPTSGCRSMFHECKDVCSYR  
>Agos-XP\_027838196.1 BCR3 uncharacterized protein  
LOC114120478  
MVAHKMLSLVLVGLLLSSTAHAAGPLAAGVCYAGCAAVTVACFSAAGFTFGTVPGAIIAAT  
PALAACNAAFGICEASCIAALVVFPV  
>Acra-KAF0749826.1 BCR3  
MTAQKMWTFVLVGLLLMTCVTEASRLNRFMSNVCFYFGCLAERVACFSSTGAIFGTVPYGI  
IAVTPTELECTVVFICKKASCIAILISSKI  
>Acra-KAF0768549.1 BCR3  
MVTHKMLSLVLVGLLLSSSAHAGPLAAGVCYAGCAAVTVACFSAAGFTFGTVPGAIIAAT  
PALAACNAAFGVCEASCIAALVVFPV  
>Acra-VUJU01000019.1 BCR3  
MTAKKNILATVFIVLLFSTSVTPTNIFISAVCFSGCGTMLVTCYVITGLEIIKAADVDDH  
LPKSGCKAMFQECKAICVKSYSK  
>Cced-VVC36620.1 BCR3  
MFARKTIVLLTVLMMFGIAQAGPLAAGICYAGCASVTVACFAAAGFTFGTVPGAVIAATP  
ALAACNTAFGICEAACVAALVAPT  
>Pnig-scaffold 705 BCR3

|      |                                                                                                                                                                                                                                                                                                                                                                                                                                                                                                                                                                                                                                                                                                                                                                                                                                                                                                                                                                                                                                                                                                                                                                                                                                                                                                                                                                                                                                                                                                                                                                                                                                                                                                             |
|------|-------------------------------------------------------------------------------------------------------------------------------------------------------------------------------------------------------------------------------------------------------------------------------------------------------------------------------------------------------------------------------------------------------------------------------------------------------------------------------------------------------------------------------------------------------------------------------------------------------------------------------------------------------------------------------------------------------------------------------------------------------------------------------------------------------------------------------------------------------------------------------------------------------------------------------------------------------------------------------------------------------------------------------------------------------------------------------------------------------------------------------------------------------------------------------------------------------------------------------------------------------------------------------------------------------------------------------------------------------------------------------------------------------------------------------------------------------------------------------------------------------------------------------------------------------------------------------------------------------------------------------------------------------------------------------------------------------------|
|      | <p>MSARKDVLLSVFVAMLMSSVAPTHILVSVVCYSGCGSMALVCYLSTGIANGLHPSKSTE<br/>SSNADCGKSYDSCISDCVLNF<br/>&gt;Pnig-scaffold 2336 BCR3<br/>MLSLILVGLLMMANATEAGRLASNFCYFGCLAERVACFSSSGAILGTVFPGMIAVAPALK<br/>TCTAIFGVCKASCFAILLMPII<br/>&gt;Mros-WHPZ01586055.1 BCR3<br/>MSARKNVLPILFVLLIMSPVTPTSIFISAVCYSGCGSLALVCYVSNVGTIGMDYIKSTV<br/>TLPSELTCGEAFDECKDNCLSTFSF<br/>&gt;Mros-WHPZ01559067.1 BCR3<br/>MLSLMLVGLLIASSANAGPLAAGICYAGCAGVTVACFSAAGFTFGTVPGALIAATPALAA<br/>CNAAFGICEASCMAALFVP<br/>&gt;Mros-WHPZ01582937.1 BCR3<br/>IWSLMLAGLLIASSANAGPIAAGICYAGCAAVTVACFAAAGFTFGTVPGAVIAATPALAA<br/>CNAAFGICEASCVAALVVP<br/>&gt;Asol-PvMI01067726.1 BCR3<br/>MWVKNNMLPSLFIVLLIMSPVTPTSFFIAYVCYAGCGSLALVCYVSNGISNGIQYVKTASV<br/>LPPAEIGCAEAFGDCKTDCLNF<br/>&gt;Asol-PvMI01040116.1 BCR3<br/>MWSLILVGLLISSANAGPIAAGVCYAGCAAVTVACFSAAGFTFGTVPGAVIAATPALAAC<br/>NAAFVCEASCMAALFVP<br/>&gt;Smis-CM017802.1 BCR3<br/>MSAQKNVLPALFIMLLIMTPTPTNVLIASVCYSGCGSLALVCYVYNGISIGVDYFKSSDP<br/>LPSLESSCGRSFKRCKDHCLKTFTF<br/>&gt;Smis-SSSL01000270.1 BCR3<br/>LWSLIFVGLSISSSANAGPIAAGICYAGCAAVTVACFSAAGFTFGTVPGALIAATPVVAAC<br/>NAAFGICEASFITALIVP</p>                                                                                                                                                                                                                                                                                                                                                                                                                                                                                                                                                                                     |
| BCR6 | <p>&gt;Apis-BCR6 (ACYPI49532)<br/>MDLFKKFCFVYLILHLTLLLFVDSSDYDDYEERKKYNGSVPNENKTCLIAWETSIMSEPT<br/>PTCWIMCKIRCILLSRTTQWRCKISNNQIWENCHCCNDDTSYATFDY<br/>&gt;Dnox-NW 015369358.1 BCR6<br/>MNLLKKAYFVYFIFISLLYGDSYESDEKRAKYNDKDNSEKTCNVPWSTSVFPEPMTSC<br/>YFFCKKRCQALSFTSQWRCEEIVSFAITKCQCKGEFSNYIYNY<br/>&gt;Dnox-XP 015376899.1 PREDICTED: uncharacterized protein<br/>LOC107171180 [Diuraphis noxia] BCR6<br/>MNLLKKACFVYFILVLSLLFVDSFEDGEKRAKYNGDAPNDNRTCNI PWKTSLFSEPYSSC<br/>WVMCKGRCIFLSRTTQWRCKKSKYDLLGNCHCCNDDTLNVYFDL<br/>&gt;Mper-MYZPE13164 0 v1.0 000200120.1 pep   104 aa BCR6<br/>MSLLKKACFVYFIFTLTLLFVSSYEDYERRAKYNADDENDNKT CNIPWETSLMSEYPSPC<br/>WLMCKGRCIILSRTTQWRCKMSPNEIFGNCHCCDDNVNVIYDF<br/>&gt;Mcer-Mc581 BCR6<br/>MNLLKKACFVFILTLTLLLVSSYEDNEKRAKYNGDDANDNKT CNVPWETSLMSEYPSPC<br/>WLMCKGRCILLSRTTQWRCKMSPNEIFGNCHCCGGE<br/>&gt;Save-JK721916.1 BCR6<br/>MSLLRKFCIICLILNLTFLFADSYDDVDYEP LKKYDGDVPNDNKT CGVTWRTSWLSELT<br/>PSCWIVCKVRCIILHRTTQWRCKKSDNPMWENCHCCTD<br/>&gt;Masc-FO024986 BCR6<br/>MNPLKITCFIYFIVLLMSFCVYSKEEVYSKYDDVPNDNKT CYFPWKTSILPEPYPTCWL<br/>MCRLRCIVMSRTSQWRCKKSNHNLQGCNCCTDN<br/>&gt;Pnig-scaffold 992 BCR6<br/>VYFIYFIVLLMSVGLDSEEEENFSKYYGDMSNDNKT CYDPWQKSLSEPFLVCWSSCKIR<br/>CFILSGTGQFRCKKSYFGVVGNCQCCRDN<br/>&gt;Pnig-scaffold 4247 BCR6<br/>MYLINKTSFISFILLSLICVHVNSDCRGAYNDSATDDKKCCPVAWTT PQLTVIKESYTQC<br/>ANNCKTRCLNKRKTPQWQCLANTFTTLYSNCRCTGEIRKLT YK<br/>&gt;Pnig-scaffold 6689 BCR6<br/>MYLINNTSFIFFILLSLVCVND AENDTCVYKSDPNKKCCPNMGWTVNCLDSSGKPKAI<br/>DYSNCISNCQSDCANNKGTKEWACAQMGSLYKCMCCVSEILNKL<br/>&gt;Pnig-scaffold 18197 BCR6<br/>MYFINKTSFISFILLSLVYMHVNGDCLSVDECCSYNWTALLITTPFECDHGCF SNCQSIE<br/>HTQNWYCVQDHRHNTGT CYCCTGEIHKLT Y</p> |

|      |                                                                                                                                                                                                                                                                                                                                                                                                                                                                                                                                                                                                                                                                                                                                                                                                                                                                                                                                                                                                                                                                                                                                                                                                                                                                                                                                                                                                                                                                                                           |
|------|-----------------------------------------------------------------------------------------------------------------------------------------------------------------------------------------------------------------------------------------------------------------------------------------------------------------------------------------------------------------------------------------------------------------------------------------------------------------------------------------------------------------------------------------------------------------------------------------------------------------------------------------------------------------------------------------------------------------------------------------------------------------------------------------------------------------------------------------------------------------------------------------------------------------------------------------------------------------------------------------------------------------------------------------------------------------------------------------------------------------------------------------------------------------------------------------------------------------------------------------------------------------------------------------------------------------------------------------------------------------------------------------------------------------------------------------------------------------------------------------------------------|
|      | <p>&gt;Pnig-scaffold 4321 BCR6<br/>MYLINNTSFIFFILLSLICVNDATNDCCVYNESAPNEKRCCPNWDWKEPRDLAAGKYISQE<br/>YSTCLCTCKAECKHYLNIQKWACTPMDYHVMCCVSEILN</p> <p>&gt;Mros-WHPZ01589938.1 BCR6<br/>MNLLKKICFIYLILNLTFFLFVDSYDDYEERKKYDGNLPNDNKTCEIPWETSIMSEPT<br/>TCYIMCKVRCIILSRTVQWRCKASSNGIWENCHCCNGE</p> <p>&gt;Mros-WHPZ01474234.1 BCR6<br/>MYFINNLGLFFLILFTLAYVNCDEKGPYSSHDDSEHKCKIDWVRATDGNHIMSCSVKC<br/>QTKCRYQNTDQWRCKSSSTGLTKTCECCRG</p> <p>&gt;Mros-WHPZ01235886.1 BCR6<br/>MYLINNLSLFFLILFTLAYVNCDDERGPYHSSAEDDQKQCMVKWVKATHGGGNIASCLFC<br/>KLKCKKKKTSQWRCKSKSGLTKKCECTGE</p> <p>&gt;Asol-PVMI01043125.1 BCR6<br/>MGLLKKACFVYFILTLTLLFVSSYEDYEKRAKYNDYDENENKTCNVPWETSMSEPYSSC<br/>WLMCKGRCIILSRTSQWRCKKSHHEILGNCHCCGGE</p> <p>&gt;Smis-CM017798.1 BCR6<br/>MSLLRKFCIICLILNLTFFLFADSYDDVDYEPLKKYDGDVPNDNKTGVTWRTSWLSELT<br/>PSCWIVCKVRCIILHRTTQWRCKSDNPMWENCHCCTGE</p> <p>&gt;Smis-CM017799.1-7773692 BCR6<br/>MFLINNSGLIFLILFTLAYVNCDDTPGPYNSGDESDNKKCTIPWVPVTPEEGDTSTCLL<br/>KCQTKCSDSQTDQWRCKSLKKCECCRG</p>                                                                                                                                                                                                                                                                                                                                                                                                                                                                                               |
| BCR8 | <p>&gt;Apis-BCR8<br/>MSGYAKLLIFAFLLVLSVSQVLGCRGQCWKDVKPRDDFCSEIFRYQYTTMAPANVLCYCC<br/>RRFIVED</p> <p>&gt;Agly-AG001416-PA   80 aa BCR8<br/>MYRYTKVVVFVFIILTLASLANSSSMTTEGYKCPRSHCWTEKEPRDEFCSITFRYEFATI<br/>ELANVFCYCCRRLLGSFILQ</p> <p>&gt;Dnox-XR_001505997.1 BCR8<br/>MSHNMKLVIFAFLLILSVSQACGCRNNCWTDIKYRDDYCSSELFQYTTMDPANVLCYCC<br/>RRL</p> <p>&gt;Mper-MYZPE13164 0 v1.0 000003380.1 pep   66 aa BCR8<br/>MNRNVKLVIFAFLLILSVSQVLGFGCPRGQCWIDKKKRDDFCLEIFRYEHTTMDPANVLC<br/>FCCRRL</p> <p>&gt;Mcer-Mc1616 BCR8<br/>MNHNVKLLIFAFLLILSVSQVLGCRGQCWIDIKPRDDFCSEIFRYQYTTIAPENVLCYCC</p> <p>&gt;Akon-FQ999398.1 BCR8<br/>MNGHAKLLIFAFLLILSVSQVLGCRGQCWEEVKPRDDFCSEIFRYQYTTMEPANVLCYCC<br/>RRFKLE</p> <p>&gt;Masc-FO018431.1 BCR8<br/>MNRFTQLLIFAILLVLTISQVSACRGNCWTDEKYRDSYCSEIFRYKYRTFDVANVMCHCC<br/>RSVI</p> <p>&gt;Rpad-FO059758.1 BCR8<br/>MNRYIQLLVFVILLTSLISQVSGCRGQCWTDVKFRGEFCSQIFRYVYTTMEPANVVCYCC<br/>RR</p> <p>&gt;Rmai-NC_040878.1 BCR8<br/>MNRYLQLLVFVILLTSLSVSQKSGCRGQCWTDVKFRDEFCSQIFRYVYTTIEPANVVCYCC<br/>RR</p> <p>&gt;Agos-NW_021007069.1 BCR8<br/>MYRYTQLVVFVFIILTLASLANSSSVTTEGYKCPRRQCWTEVEPRDEFCSQIFRYEFTTK<br/>EPTNVFCYCCRR</p> <p>&gt;Msac-NW_020271346.1 BCR8<br/>MNRFTQLLVFVILLTSLISQVLGKCRDECWIDFRIRDDSCPLLFRYQYVTAAPANILCFC<br/>CR</p> <p>&gt;Acra-KAF0753610.1 BCR8<br/>MYRYTQLVVFVFLFTLSVLSKKSISVTTEGYKCQRGQCWTEVEPRDDFCSEMFRYEFITL<br/>PPANVLCYCCRR</p> <p>&gt;Acra-VUJU01015826.1 BCR8<br/>MYRYMRLVVFVILLTSLVILARSAPMAEGDTCYRGQCWTEVKPRDDFCSEIFRYDFTSKA<br/>NVLCYCFRR</p> |



|                                                                                                                                                                                                                                                                                                                                                                                                                                                                                                                                                                                                                                                                                                                                                                          |
|--------------------------------------------------------------------------------------------------------------------------------------------------------------------------------------------------------------------------------------------------------------------------------------------------------------------------------------------------------------------------------------------------------------------------------------------------------------------------------------------------------------------------------------------------------------------------------------------------------------------------------------------------------------------------------------------------------------------------------------------------------------------------|
| <p>&gt;Acra-VUJU01005956.1 BCR8<br/> MYRYMQLVVFVFLTLTSLVSLAKSDPIVEGDTCFRGQCWTEVKPRDDFCTDIFRYNFTSKA<br/> NELCYCCRR</p> <p>&gt;Pnig-scaffold 94 BCR8<br/> MNRYTQLLIFAILLILTQALACRGNCWIDEKYRDSFCSEIFRYKYKIPNPFVNILCHCCRR</p> <p>&gt;Mros-WHPZ01587143.1 BCR8<br/> MNGQAKLLIFAFLILTVSQVLGCRGRCWEDVKFRDDFCSEIFRYQYTTMKPAKALCYCCRRFKIE</p> <p>&gt;Mros-WHPZ01588751.1 BCR8<br/> MNRITTYMVILAIIVVFCLSVTVMGCETNCWLNDWITRDSACNGRVRSYPGPSNGRCYCCQ</p> <p>&gt;Asol-PVMI01009763.1 BCR8<br/> MNCNVKLLIFAFLILSVSHVLGCRGNCWIDLKYRDNFCSEIFRYQYTTMEPANVLCYCCRR</p> <p>&gt;Smis-CM017797.1-29839389 BCR8<br/> MNSTVKLLIFAFLILSVSQVLGCKGQCWKDAEPRDDFCSQEFYQYLTSKPANVLCYCC</p> <p>&gt;Smis-CM017797.1-29874451 BCR8<br/> MNRITTYMVILAIIVVCLSVTVMGCEKNCWLNDWRTRDAACNDRVKYSYPGPFVHGKCYCCR</p> |
|--------------------------------------------------------------------------------------------------------------------------------------------------------------------------------------------------------------------------------------------------------------------------------------------------------------------------------------------------------------------------------------------------------------------------------------------------------------------------------------------------------------------------------------------------------------------------------------------------------------------------------------------------------------------------------------------------------------------------------------------------------------------------|

<sup>a</sup> **Abbreviations:** Acra, *Aphis craccivora*; Agly, *Aphis glycines*; Agos, *Aphis gossypii*; Akon, *Acyrtosiphon kondoi*; Apis, *Acyrtosiphon pisum*; Asol, *Aulacorthum solani*; Cced, *Cinara cedri*; Dnox, *Diuraphis noxia*; Masc, *Myzus ascalonicus*; Mcer, *Myzus cerasi*; Mper, *Myzus persicae*; Msac, *Melanaphis sacchari*; Mros, *Macrosiphum rosae*; Pnig, *Pentalonia nigronervosa*; Rmai, *Rhopalosiphum maidis*; Rpad, *Rhopalosiphum padi*; Save, *Sitobion avenae*; Sgra, *Schizaphis graminum*; Smis, *Sitobion miscanthi*; Tcit, *Toxoptera citricida*. No BCR were found in Elan, *Eriosoma lanigerum* and Sfla, *Sipha flava*.
